# Supplementary material
Source: PubMed Central journal article supplement (PMC3175785)

**Figure S1**

Data analysis process for identifying and validating somatic mutations in 187 cases of HR-ALL

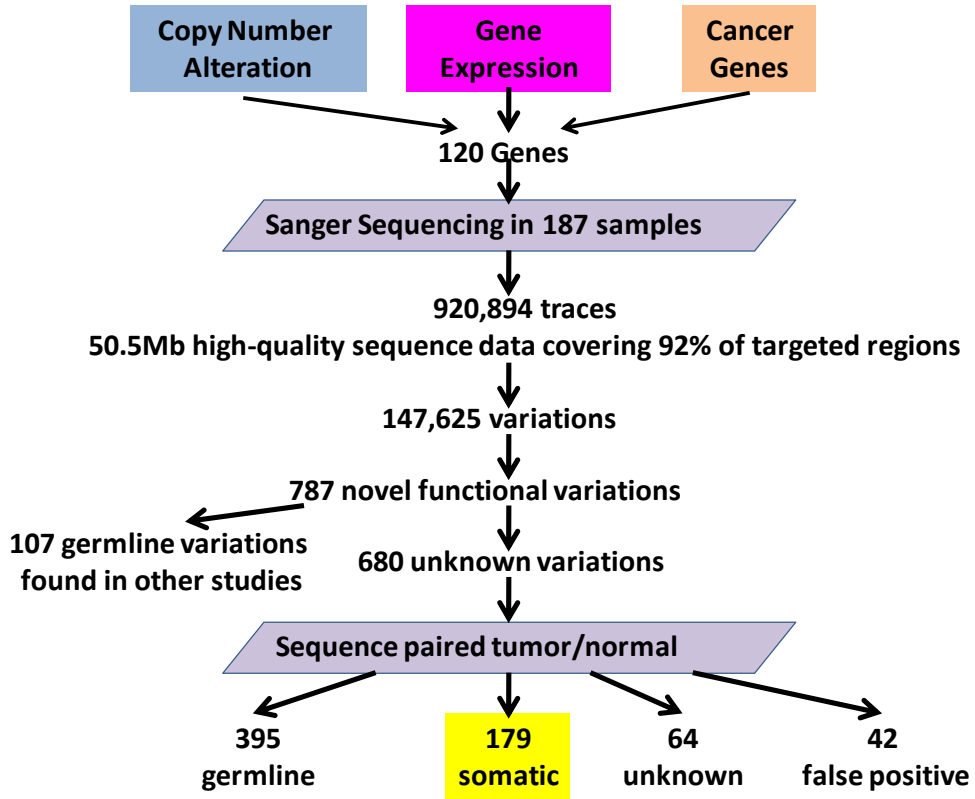

**Figure S2. Double-mutants in NRAS and KRAS**

A) KRAS G12D and G13D double-mutation in case 9906\_215. B) NRAS G12V and G13D double-mutation in case 9906\_106

A)

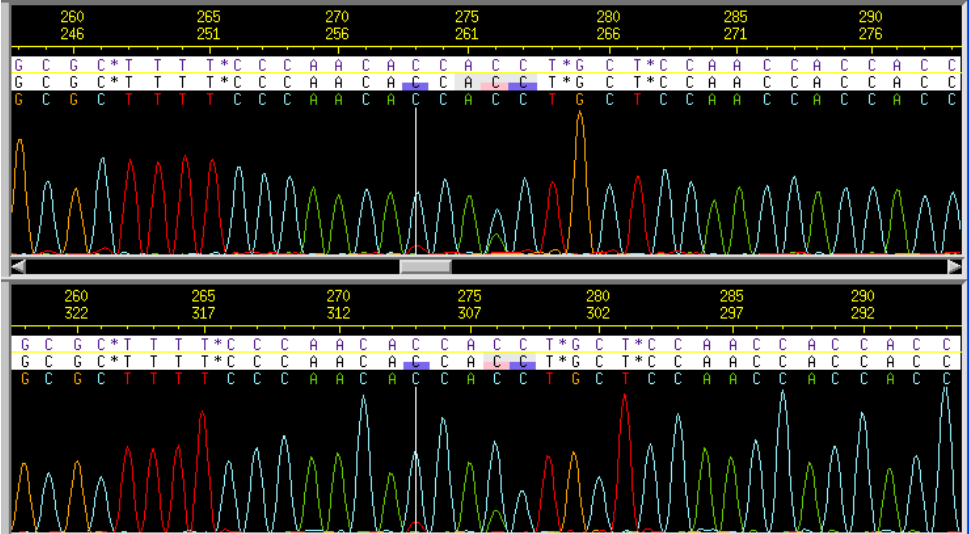

B)

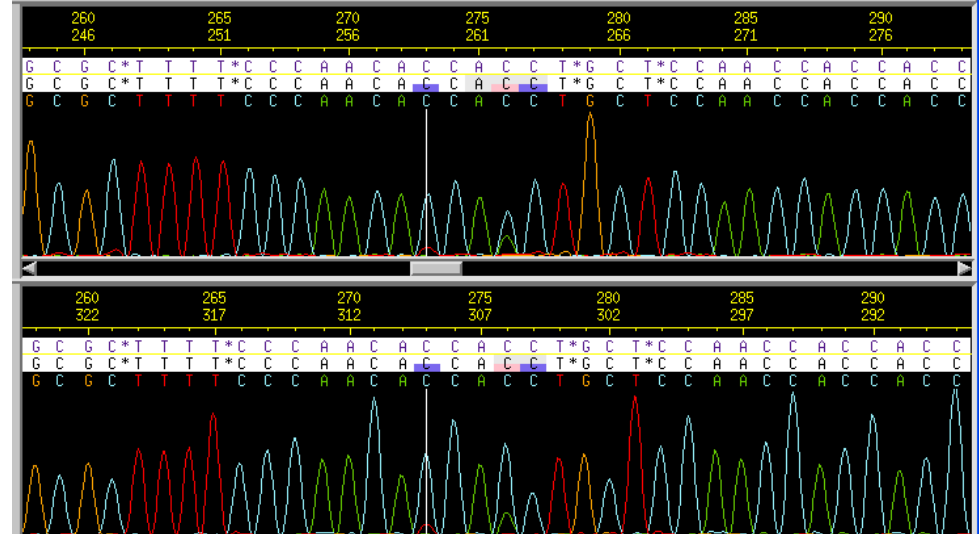

**Figure S3. *IKZF1* deletion pattern in R8 (top), R7 (middle) and R6 (bottom)**

The blue bars indicate the location of the deletion for each sample. The green vertical bars indicate somatic sequence mutation.

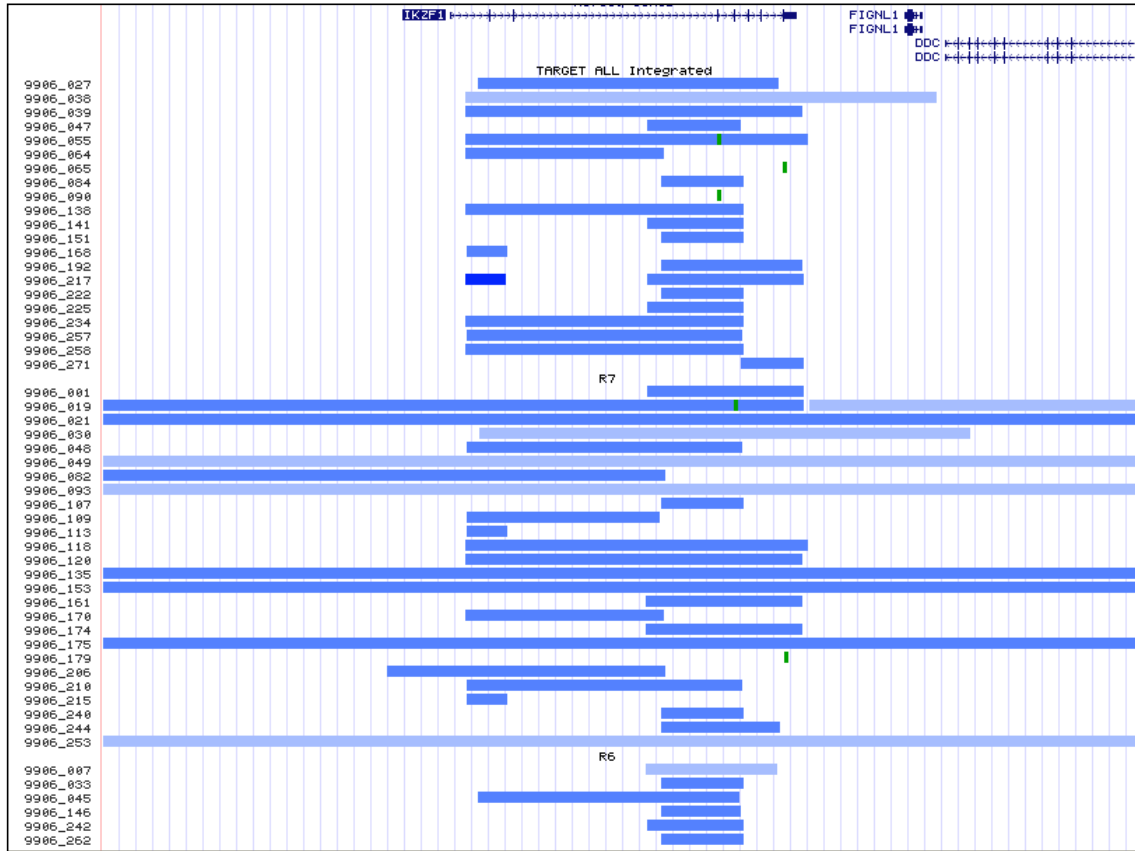

**Figure S4**

There was no significant association between the presence or number mutations affecting Ras signaling and outcome in this study.

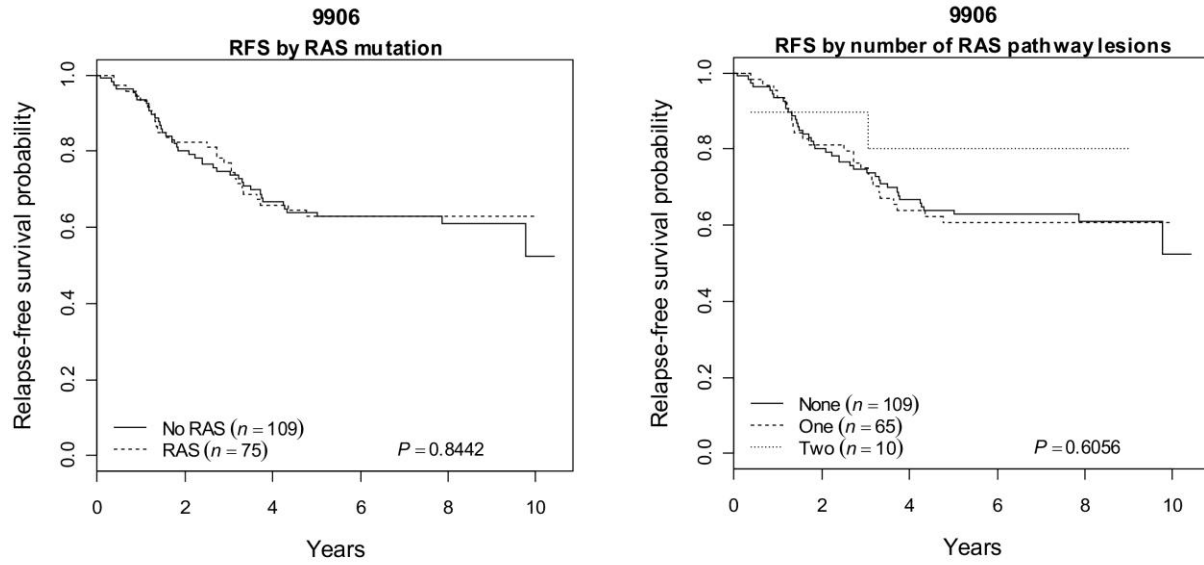

Supplement: supp_blood-2011-03-341412_Document1.pdf [file supp_blood-2011-03-341412_Document1.pdf]
